# Supplementary material
Source: publisher figshare collection journal article supplement (https://tandf.figshare.com/ndownloader/files/17589710)

## **Supplemental File**

### **First report of antioxidant 1*H*-benzochromenone from muricid gastropod *Chicoreus ramosus* as dual inhibitors of pro-inflammatory 5-lipoxygenase and carbolytic enzymes**

Kajal Chakraborty<sup>\*,1</sup>, Soumya Salas<sup>1,2</sup>

Central Marine Fisheries Research Institute, Ernakulam North P.O., P.B. No. 1603, Cochin 682018, India

---

\*Corresponding author. Address: Marine Bioprospecting Section of Marine Biotechnology Division, Central Marine Fisheries Research Institute, Ernakulam North, P.B. No. 1603, Cochin, India. Tel.: +91 484 2394867; fax: +91 484 2394909.

E-mail address: kajal\_cmfri@yahoo.com; kajal.chakraborty@icar.gov.in (K. Chakraborty).

<sup>1</sup> Equal contribution

<sup>2</sup>Department of Chemistry, Mangalore University, Mangalagangothri- 574199, Karnataka State, India

---

## **Acknowledgements**

The authors are thankful to Indian Council of Agricultural Research (ICAR) for funding under the ICAR-Consortium Research Platform project on “Health Food” (grant number ICAR/HF/2012-2017). The authors thank the Director, Central Marine Fisheries Research Institute (CMFRI) for his guidance and support. Thanks are due to the Head, Marine Biotechnology Division of CMFRI for facilitating the research activities. S.S. thankfully acknowledges ICAR for the award of a fellowship.

---

## **ABSTRACT**

Chromene derivatives with manifold structural framework and pharmacological properties were ubiquitous in the mollusks of marine origin. A previously undescribed 1*H*-benzochromenone was isolated through bioassay-guided chromatographic purification of the organic extract of the marine gastropod mollusk *Chicoreus ramosus*. The compound was characterized as 6-(2',2'-dimethyl)-3'-en-1'-yl-1'-oxy)-3-hydroxy-1*H*-benzo[*c*]chromene-2(10*aH*)-one based on integrated spectroscopic analysis. The antioxidant studies by employing the stable free radicals reported that the antioxidant activity (IC<sub>50</sub> 1.4-1.6 mM) was comparable to  $\alpha$ -tocopherol (IC<sub>50</sub> 1.4-1.7 mM). The attenuating potential of the studied compound against pro-inflammatory 5-lipoxygenase (IC<sub>50</sub> 2.12 mM) was significantly greater than that exhibited by anti-inflammatory drug ibuprofen (IC<sub>50</sub> 4.4 mM), whereas its inhibitory properties against carbolytic  $\alpha$ -amylase (IC<sub>50</sub> ~0.72 mM) was comparable with that displayed by acarbose (IC<sub>50</sub> 0.43 mM). The present study recognized the potential of 1*H*-benzochromenone derivative isolated from *C. ramosus* as important pharmaceutical lead with anti-diabetic and anti-inflammatory potentials to reduce the risk of hyperglycaemia and inflammatory pathologies.

**Keywords:** Gastropod mollusk, *Chicoreus ramosus*, 1*H*-benzochromenone derivative, pro-inflammatory 5-lipoxygenase, carbolytic enzymes, anti-diabetic and anti-inflammatory

---

## **Supplemental Data**

|                   |                                                                                                                                                   |
|-------------------|---------------------------------------------------------------------------------------------------------------------------------------------------|
| <b>Table S1.</b>  | NMR spectroscopic data of 6-(2',2'-dimethyl)-3'-en-1'-yl-1'-oxy)-3-hydroxy-1 <i>H</i> -benzo[c]chromene-2(10 <i>aH</i> )-one in CDCl <sub>3</sub> |
| <b>Table S2.</b>  | Bioactive potentials of the major column fractions of the crude solvent extract (IC <sub>50</sub> value)                                          |
| <b>Figure S1</b>  | <sup>1</sup> H NMR spectrum of 1 <i>H</i> -benzochromenone derivative (500 MHz, CDCl <sub>3</sub> )                                               |
| <b>Figure S2</b>  | <sup>13</sup> C NMR spectrum of 1 <i>H</i> -benzochromenone derivative (125 MHz, CDCl <sub>3</sub> )                                              |
| <b>Figure S3</b>  | DEPT NMR spectrum of 1 <i>H</i> -benzochromenone derivative                                                                                       |
| <b>Figure S4</b>  | <sup>1</sup> H- <sup>1</sup> H COSY spectrum of 1 <i>H</i> -benzochromenone derivative                                                            |
| <b>Figure S5</b>  | HSQC spectrum of 1 <i>H</i> -benzochromenone derivative                                                                                           |
| <b>Figure S6</b>  | HMBC spectrum of 1 <i>H</i> -benzochromenone derivative                                                                                           |
| <b>Figure S7</b>  | NOESY spectrum of 1 <i>H</i> -benzochromenone derivative                                                                                          |
| <b>Figure S8</b>  | Mass fragmentation scheme of 1 <i>H</i> -benzochromenone derivative                                                                               |
| <b>Figure S9</b>  | Mass spectrum of 1 <i>H</i> -benzochromenone derivative                                                                                           |
| <b>Figure S10</b> | IR spectrum of 1 <i>H</i> -benzochromenone derivative                                                                                             |
| <b>Figure S11</b> | HPLC chromatogram of 1 <i>H</i> -benzochromenone derivative isolated from muricid gastropod <i>Chicoreus ramosus</i>                              |

**Table S1.** NMR spectroscopic data of 6-(2',2'-dimethyl)-3'-en-1'-yl-1'-oxy)-3-hydroxy-1*H*-benzo[*c*]chromene-2(10*aH*)-one in CDCl<sub>3</sub><sup>†</sup>

| 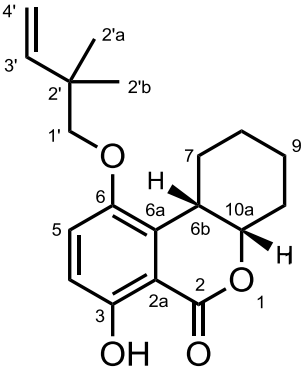 |                        |                                                 |                                     |                                      |
|-----------------------------------------------------------------------------------|------------------------|-------------------------------------------------|-------------------------------------|--------------------------------------|
| C. No                                                                             | <sup>13</sup> C, type  | <sup>1</sup> H NMR (mult, J in Hz) <sup>‡</sup> | <sup>1</sup> H- <sup>1</sup> H COSY | <sup>1</sup> H- <sup>13</sup> C HMBC |
| 1                                                                                 | -                      | -                                               | -                                   | -                                    |
| 2                                                                                 | 171.54, C              | -                                               | -                                   | -                                    |
| 2a                                                                                | 112.10, C              | -                                               | -                                   | -                                    |
| 3                                                                                 | 154.0, C               | -                                               | -                                   | -                                    |
| 4                                                                                 | 115.89, CH             | 6.90 (d, 7.1)                                   | H-5                                 | C-2a,3,5,6                           |
| 5                                                                                 | 117.56, CH             | 7.08 (d, 7.1)                                   | -                                   | C-6, 3, 6a                           |
| 6                                                                                 | 151.0, C               | -                                               | -                                   | -                                    |
| 6a                                                                                | 129.70, C              | -                                               | -                                   | -                                    |
| 6b                                                                                | 34.39, CH              | 3.65 (dt, 8.1, 2.1 )                            | H-7,10a                             | C-2a,6a                              |
| 7                                                                                 | 31.80, CH <sub>2</sub> | 1.86 (dt, 5.0, 1.3)                             | H-8                                 | C-6a                                 |
| 8                                                                                 | 29.60, CH <sub>2</sub> | 1.47 (m)                                        | H-9                                 | -                                    |
| 9                                                                                 | 29.26, CH <sub>2</sub> | 1.40 (m)                                        | H-10                                | C-7                                  |
| 10                                                                                | 29.02, CH <sub>2</sub> | 2.39 (dt, 6.2 ,1.8 )                            | H-10a                               | -                                    |
| 10a                                                                               | 81.52, CH              | 4.68 (dt, 8.0, 2.5)                             | -                                   | C-9, 2, 6a                           |
| 1'                                                                                | 79.8, CH <sub>2</sub>  | 4.06 (s)                                        | -                                   | C-6, 3'                              |
| 2'                                                                                | 39.38, C               | -                                               | -                                   | -                                    |
| 3'                                                                                | 139.0, CH              | 5.84 (dd, 16.0, 9.0)                            | H-4'                                | -                                    |
| 4'                                                                                | 114.0, CH <sub>2</sub> | 5.03 (dd, 16.8, 2.2)<br>4.98 (dd, 10.0, 2.1)    | -                                   | C-2',3'                              |
| 2'a                                                                               | 22.60, CH <sub>3</sub> | 1.25 (s)                                        | -                                   | C-2'                                 |
| 2'b                                                                               | 22.62, CH <sub>3</sub> | 1.25 (s)                                        | -                                   | C-3'                                 |

<sup>†</sup>NMR spectra recorded using Bruker AVANCE III 500 MHz (AV 500) spectrometers.

<sup>‡</sup>Values in ppm, multiplicity and coupling constants (*J* = Hz) are indicated in parentheses. Assignments were made with the aid of the <sup>1</sup>H-<sup>1</sup>H COSY, HSQC, HMBC and NOESY experiments.

**Table S2.** Bioactive potentials of the major column fractions of the crude solvent extract (IC<sub>50</sub> value)<sup>P</sup>

| Column fractions   | Antioxidant activity           |                                | Anti-inflammatory activity     | Antidiabetic activity          |                                  | Yield (g)    |
|--------------------|--------------------------------|--------------------------------|--------------------------------|--------------------------------|----------------------------------|--------------|
|                    | DPPH scavenging                | ABTS <sup>+</sup> scavenging   | 5-LOX attenuating              | $\alpha$ -amylase inhibitory   | $\alpha$ -glucosidase inhibitory |              |
| CR <sub>A</sub>    | 3.40 <sup>a</sup> ± 0.05       | 3.35 <sup>a</sup> ± 0.03       | 2.42 <sup>a</sup> ± 0.05       | 4.03 <sup>a</sup> ± 0.01       | 3.99 <sup>a</sup> ± 0.02         | 9.27         |
| CR <sub>B</sub>    | 2.45 <sup>b</sup> ± 0.03       | 2.58 <sup>b</sup> ± 0.01       | 2.98 <sup>b</sup> ± 0.02       | 2.81 <sup>b</sup> ± 0.01       | 2.03 <sup>b</sup> ± 0.05         | 5.57         |
| CR <sub>C</sub>    | 2.25 <sup>c</sup> ± 0.01       | 2.33 <sup>c</sup> ± 0.03       | 2.20 <sup>c</sup> ± 0.03       | 3.96 <sup>c</sup> ± 0.02       | 4.09 <sup>c</sup> ± 0.03         | 6.95         |
| CR <sub>D</sub>    | 2.58 <sup>d</sup> ± 0.04       | 2.44 <sup>c</sup> ± 0.01       | 2.71 <sup>d</sup> ± 0.02       | 4.88 <sup>d</sup> ± 0.01       | 4.50 <sup>d</sup> ± 0.01         | 2.07         |
| CR <sub>E</sub>    | 2.32 <sup>e</sup> ± 0.05       | 2.55 <sup>b</sup> ± 0.03       | 2.53 <sup>e</sup> ± 0.03       | 3.20 <sup>e</sup> ± 0.03       | 3.90 <sup>e</sup> ± 0.02         | 5.27         |
| CR <sub>F</sub>    | 2.08 <sup>f</sup> ± 0.02       | 2.25 <sup>d</sup> ± 0.01       | 2.44 <sup>a</sup> ± 0.01       | 3.71 <sup>f</sup> ± 0.02       | 3.88 <sup>f</sup> ± 0.01         | 4.57         |
| CR <sub>G</sub>    | <b>0.98<sup>g</sup> ± 0.02</b> | <b>0.96<sup>e</sup> ± 0.01</b> | <b>1.33<sup>f</sup> ± 0.03</b> | <b>2.22<sup>g</sup> ± 0.03</b> | <b>1.90<sup>g</sup> ± 0.02</b>   | <b>5.57</b>  |
| CR <sub>H</sub>    | 2.20 <sup>c</sup> ± 0.03       | 2.34 <sup>c</sup> ± 0.03       | 2.55 <sup>e</sup> ± 0.03       | 3.78 <sup>h</sup> ± 0.01       | 3.98 <sup>a</sup> ± 0.02         | 7.27         |
| CR <sub>I</sub>    | 1.09 <sup>f</sup> ± 0.02       | 1.53 <sup>b</sup> ± 0.03       | 1.78 <sup>g</sup> ± 0.01       | 3.98 <sup>c</sup> ± 0.02       | 3.71 <sup>h</sup> ± 0.02         | 0.95         |
| CR <sub>J</sub>    | 1.03 <sup>d</sup> ± 0.05       | 1.33 <sup>f</sup> ± 0.03       | 1.20 <sup>h</sup> ± 0.03       | 2.90 <sup>i</sup> ± 0.02       | 2.78 <sup>i</sup> ± 0.01         | 1.07         |
| CR <sub>G-1</sub>  | 0.97 <sup>a</sup> ± 0.02       | 0.94 <sup>a</sup> ± 0.02       | 1.52 <sup>a</sup> ± 0.01       | 1.99 <sup>a</sup> ± 0.02       | 2.86 <sup>a</sup> ± 0.04         | 0.08         |
| CR <sub>G-2</sub>  | 0.98 <sup>a</sup> ± 0.03       | 0.93 <sup>a</sup> ± 0.01       | 1.41 <sup>b</sup> ± 0.04       | 1.98 <sup>a</sup> ± 0.04       | 1.97 <sup>b</sup> ± 0.01         | 0.05         |
| CR <sub>G-3</sub>  | 0.92 <sup>b</sup> ± 0.02       | 0.94 <sup>a</sup> ± 0.04       | 1.35 <sup>c</sup> ± 0.02       | 1.59 <sup>b</sup> ± 0.02       | 1.57 <sup>c</sup> ± 0.02         | 0.21         |
| CR <sub>G-4</sub>  | 0.96 <sup>a</sup> ± 0.03       | 0.96 <sup>a</sup> ± 0.01       | 1.28 <sup>d</sup> ± 0.01       | 1.67 <sup>c</sup> ± 0.03       | 1.68 <sup>d</sup> ± 0.01         | 1.6          |
| CR <sub>G-5</sub>  | <b>0.76<sup>c</sup> ± 0.02</b> | <b>0.80<sup>b</sup> ± 0.01</b> | <b>0.88<sup>e</sup> ± 0.03</b> | <b>1.09<sup>d</sup> ± 0.01</b> | <b>1.14<sup>e</sup> ± 0.03</b>   | <b>1.08</b>  |
| CR <sub>G-6</sub>  | 0.90 <sup>b</sup> ± 0.01       | 1.22 <sup>c</sup> ± 0.02       | 1.09 <sup>f</sup> ± 0.02       | 1.64 <sup>e</sup> ± 0.01       | 1.58 <sup>c</sup> ± 0.02         | 1.2          |
| CR <sub>G-7</sub>  | 0.93 <sup>b</sup> ± 0.04       | 1.30 <sup>d</sup> ± 0.01       | 1.01 <sup>g</sup> ± 0.03       | 1.38 <sup>f</sup> ± 0.01       | 1.95 <sup>b</sup> ± 0.04         | 0.64         |
| CR <sub>G5-1</sub> | 0.68 <sup>a</sup> ± 0.03       | 0.67 <sup>a</sup> ± 0.01       | 0.78 <sup>a</sup> ± 0.03       | 1.07 <sup>a</sup> ± 0.01       | 1.09 <sup>a</sup> ± 0.01         | 0.08         |
| CR <sub>G5-2</sub> | <b>0.43<sup>b</sup> ± 0.01</b> | <b>0.51<sup>b</sup> ± 0.02</b> | <b>0.67<sup>b</sup> ± 0.03</b> | <b>0.23<sup>b</sup> ± 0.01</b> | <b>0.37<sup>b</sup> ± 0.04</b>   | <b>0.045</b> |

<sup>P</sup>The bioactivities were expressed as IC<sub>50</sub> values (mg/mL).

The samples were analysed in triplicate (n=3) and expressed as mean ± standard deviation. Means followed by different superscripts (a-f) within the same column of the each chromatographic column sub fractions indicated the significant differences (p<0.05).

**Figure S1**  $^1\text{H}$  NMR spectrum of 1*H*-benzochromenone derivative (500 MHz,  $\text{CDCl}_3$ )

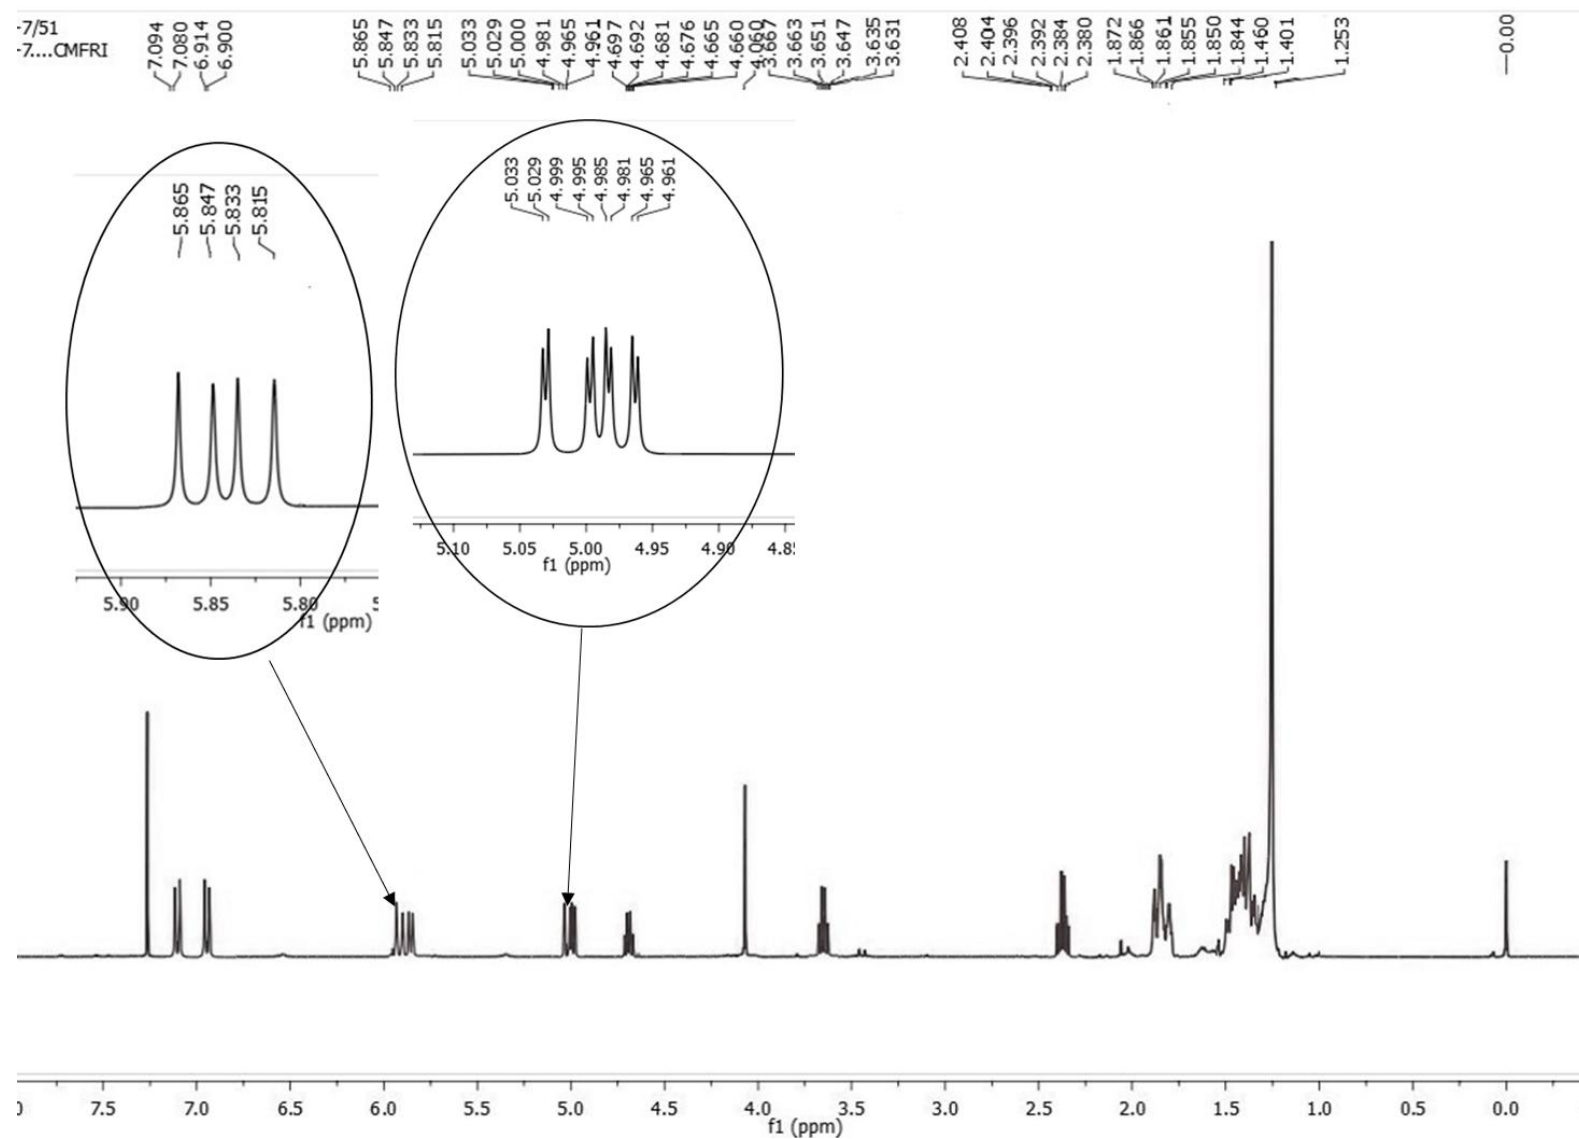

**Figure S2**  $^{13}\text{C}$  NMR spectrum of 1*H*-benzochromenone derivative (125 MHz,  $\text{CDCl}_3$ )

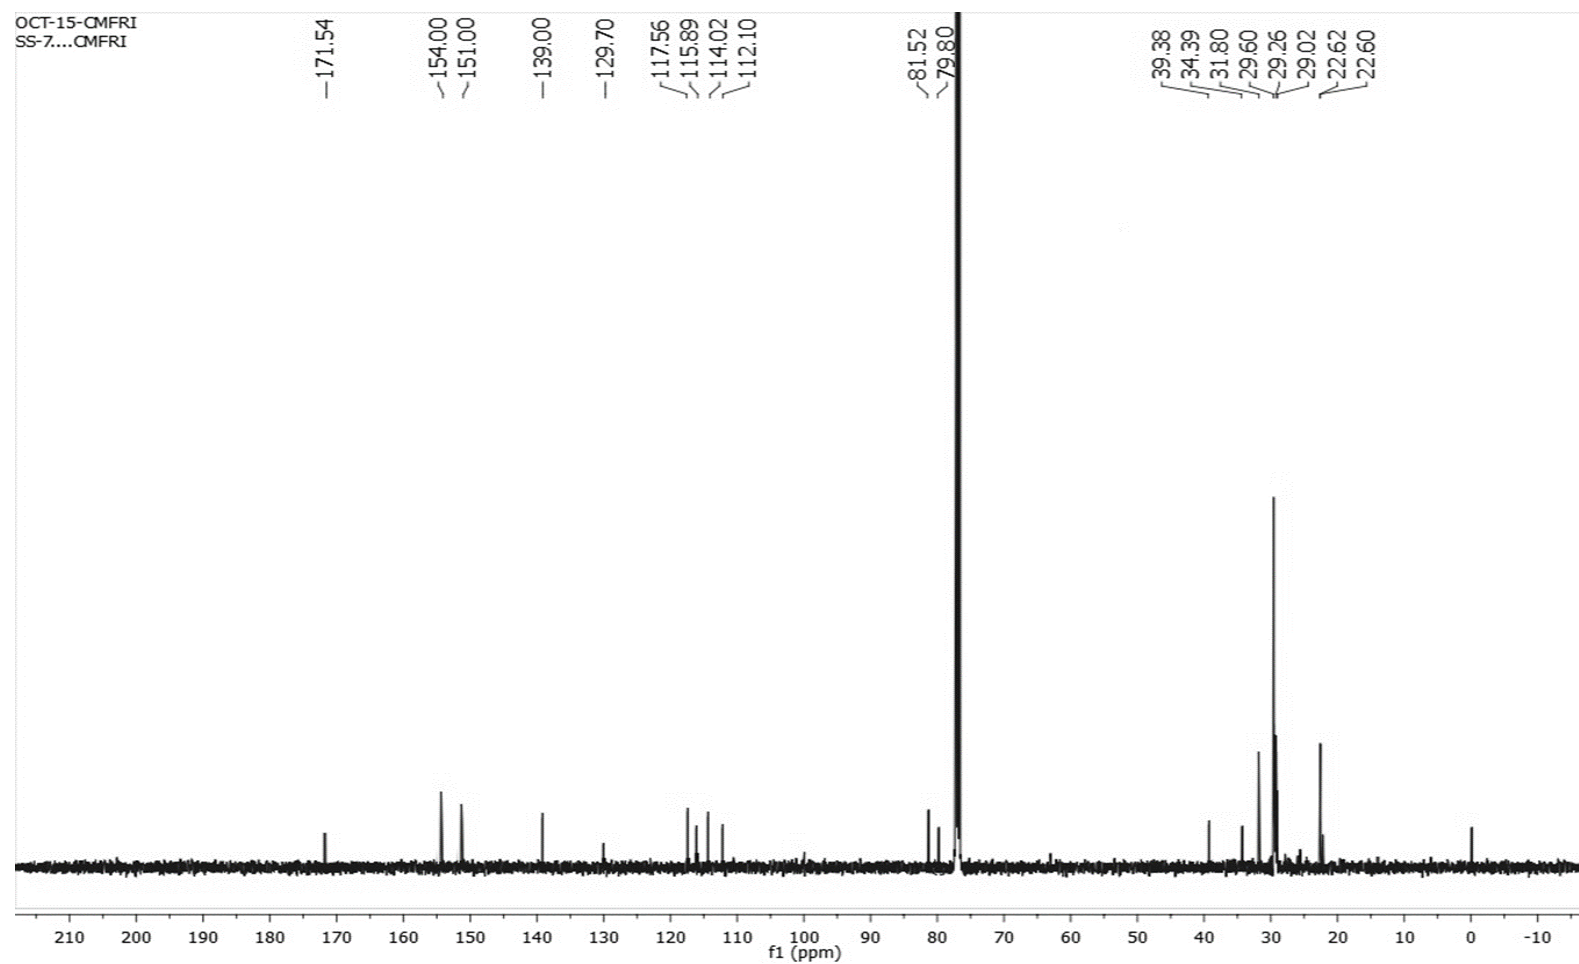

**Figure S3** DEPT NMR spectrum of 1*H*-benzochromenone derivative

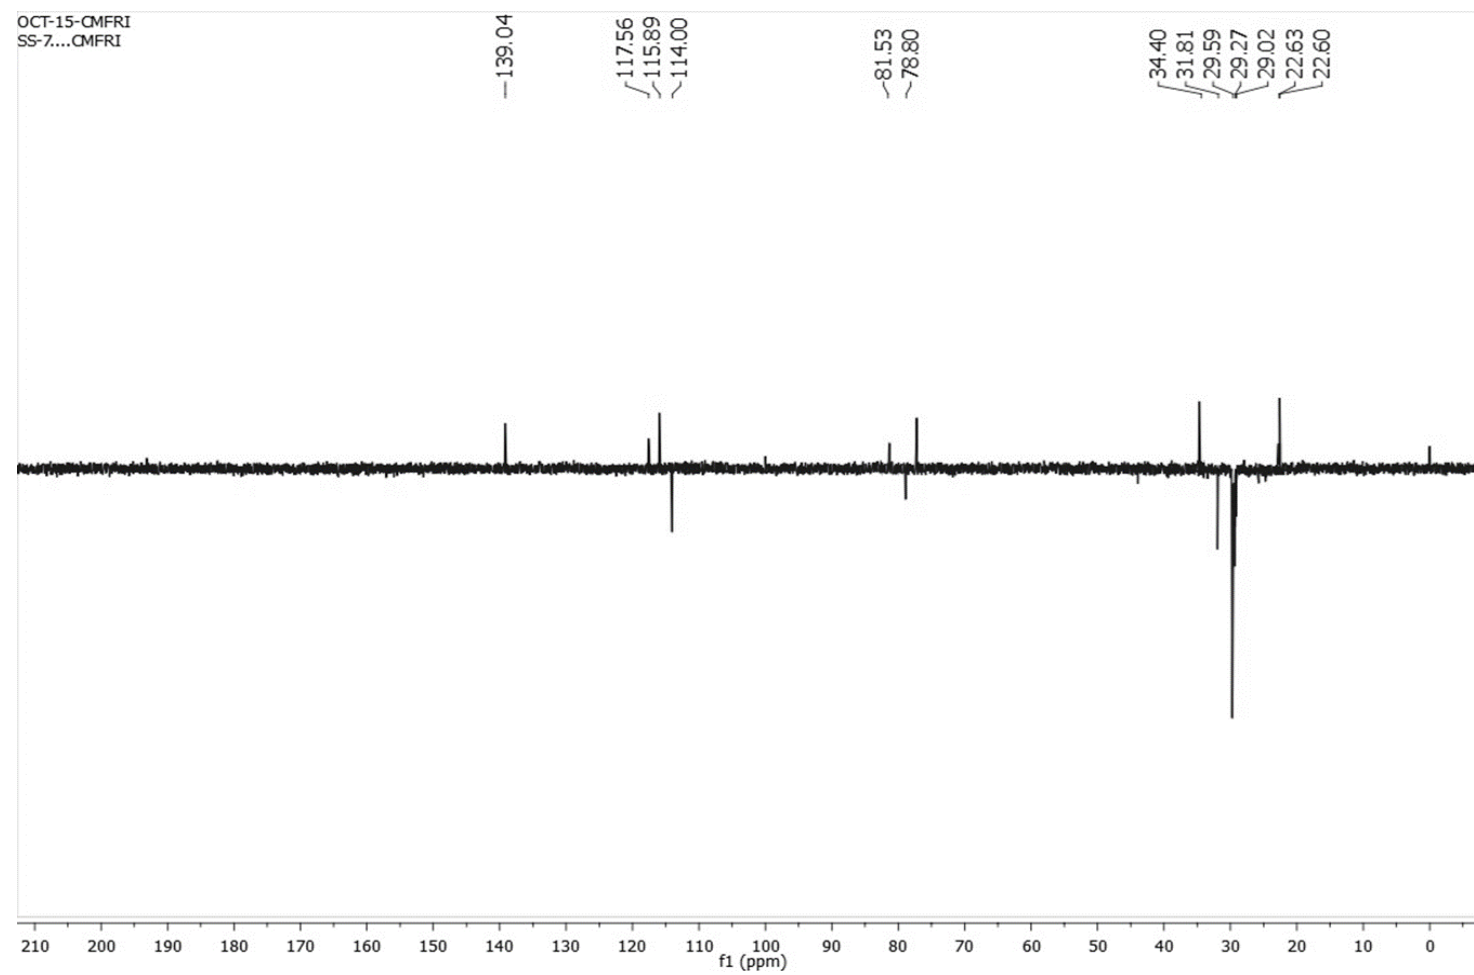

**Figure S4**  $^1\text{H}$ - $^1\text{H}$  COSY spectrum of 1*H*-benzochromenone derivative

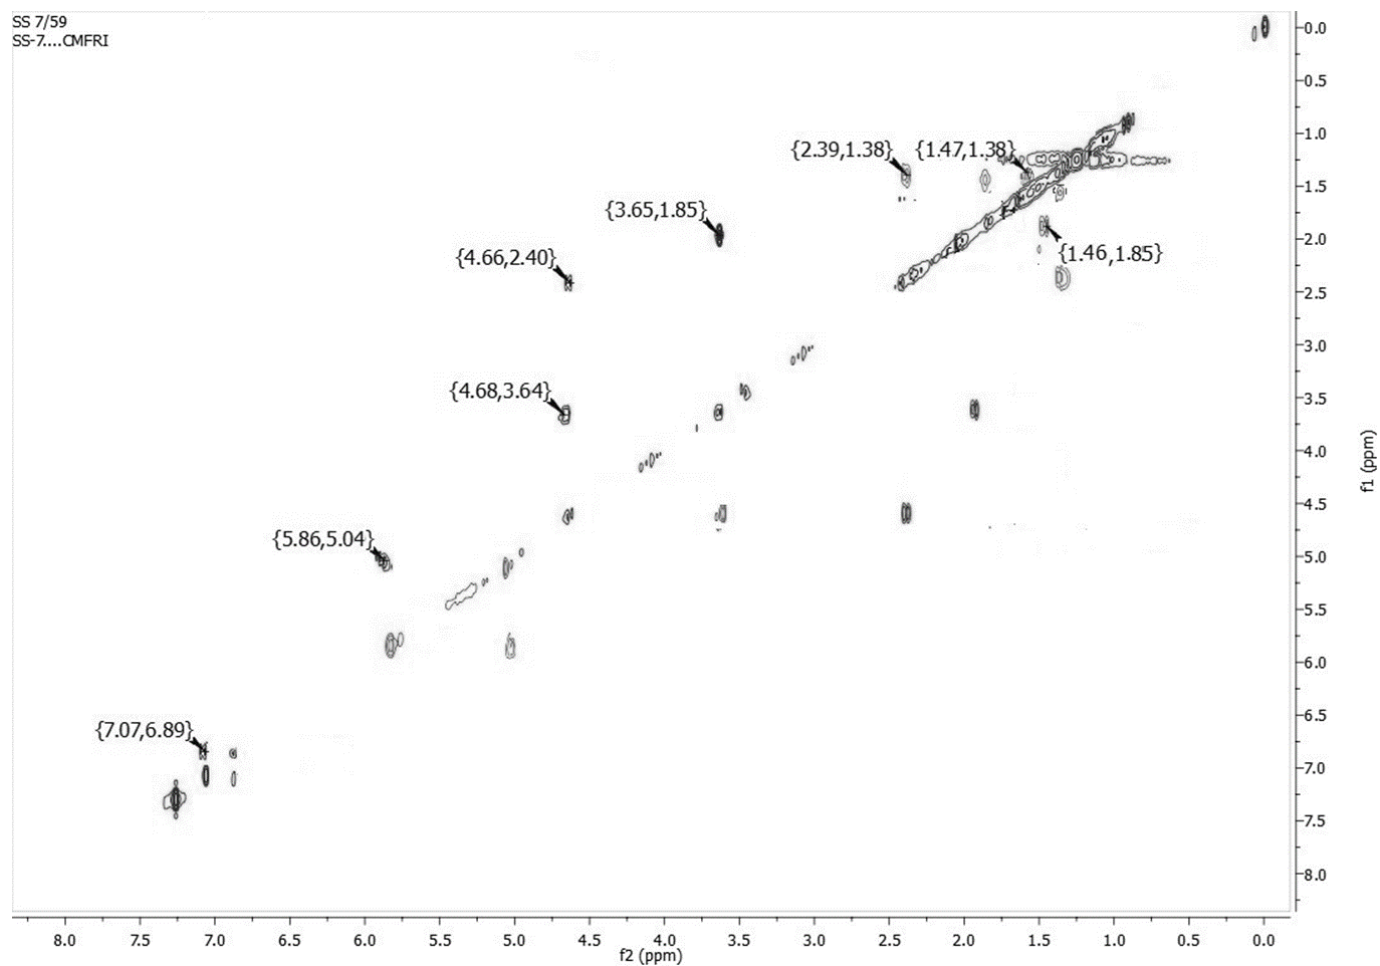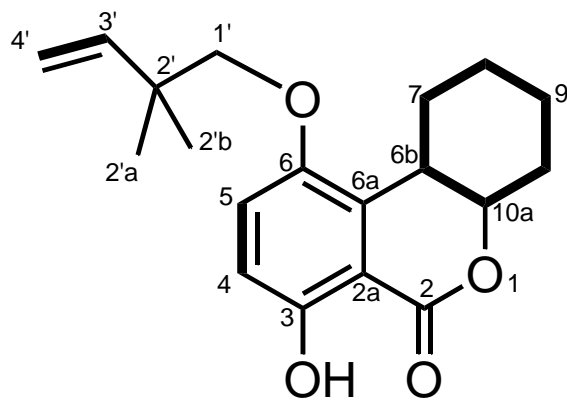



**Figure S5** HSQC spectrum of 1*H*-benzochromenone derivative

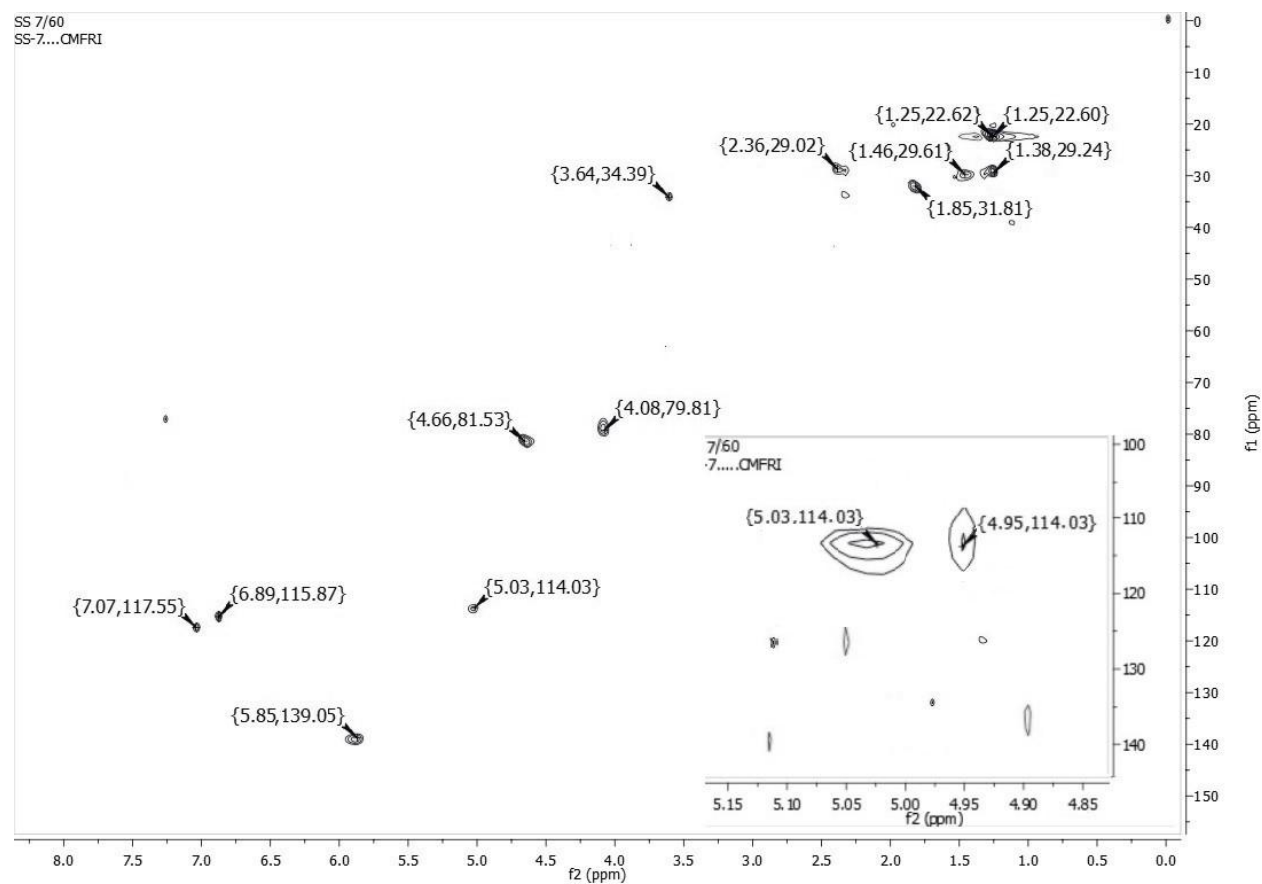

**Figure S6** HMBC spectrum of 1*H*-benzochromenone derivative

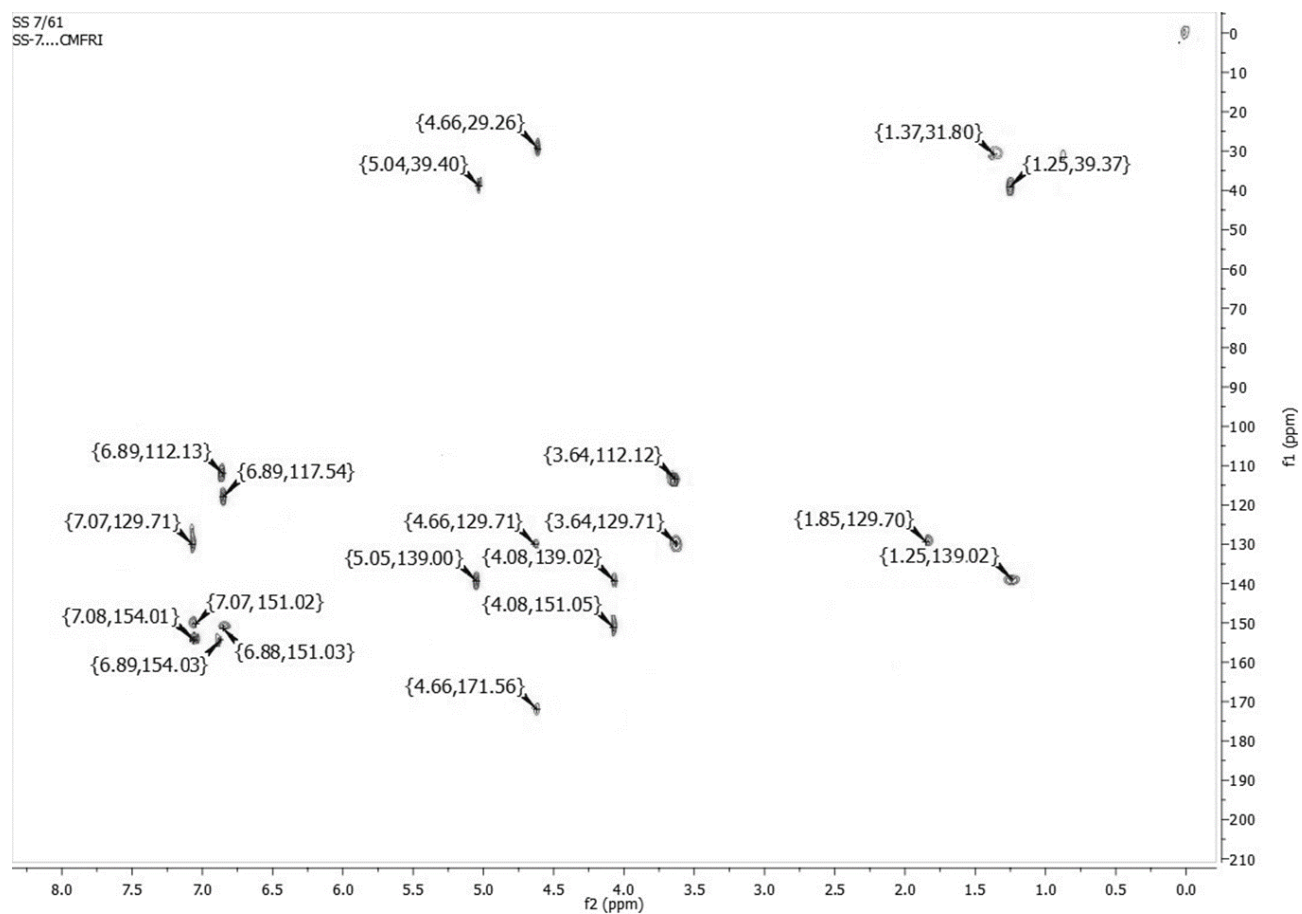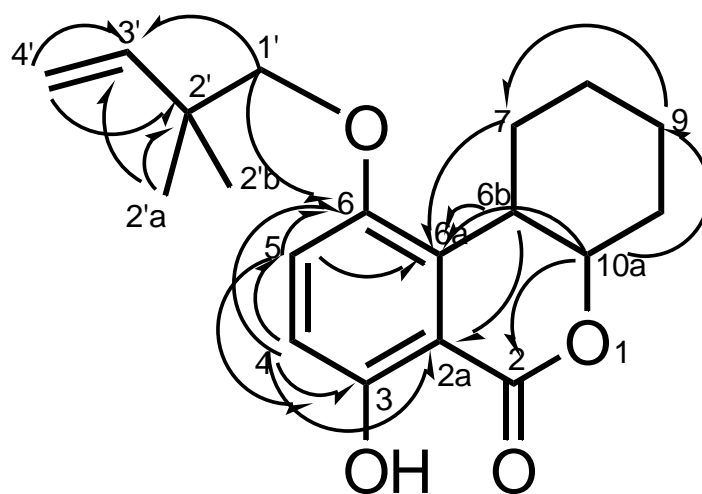

**Figure S7** NOESY spectrum of 1*H*-benzochromenone derivative

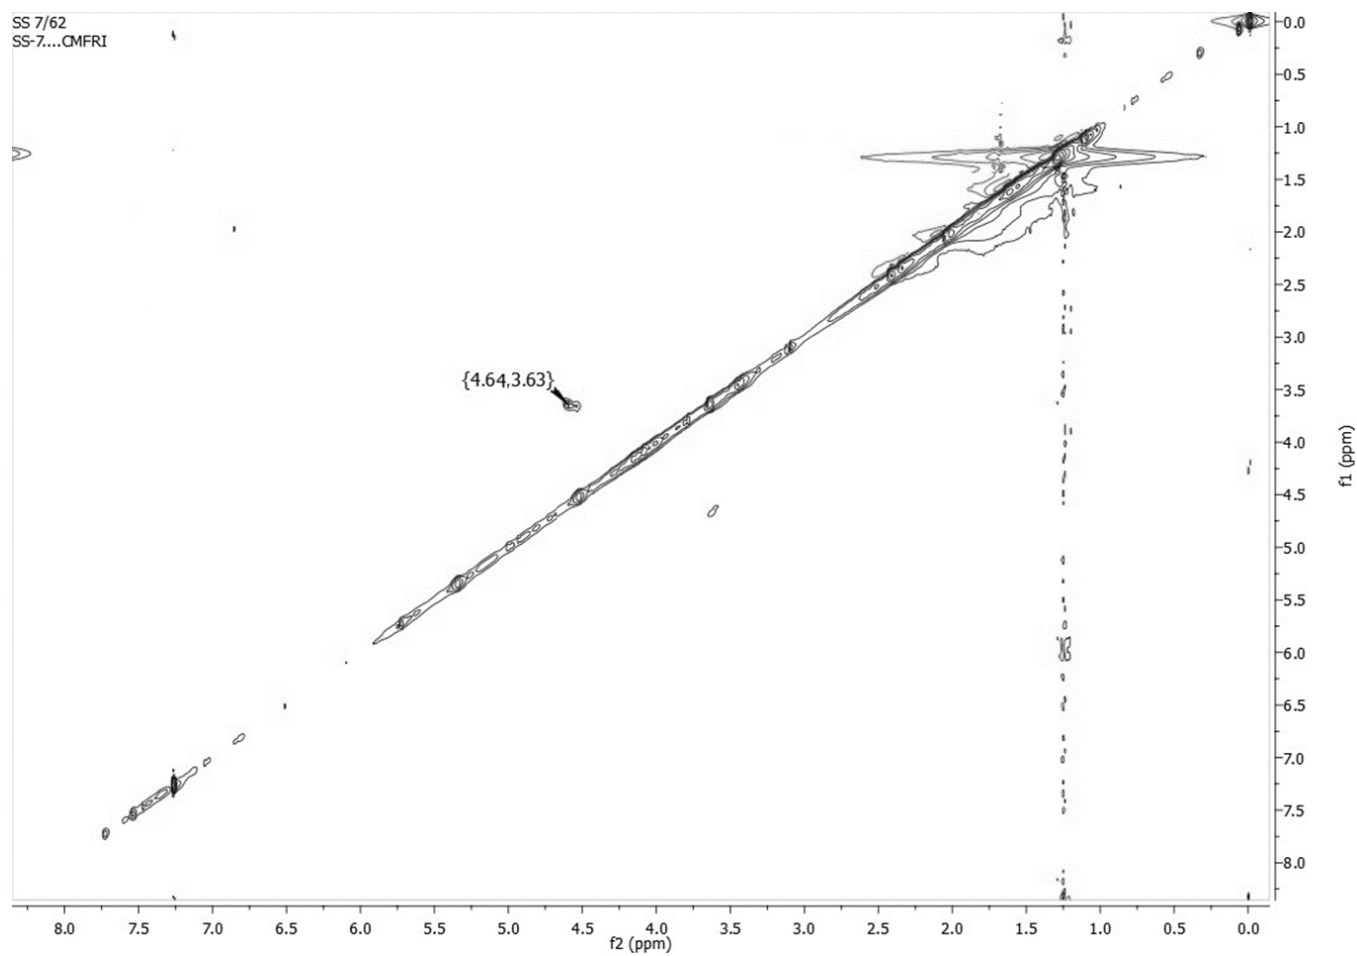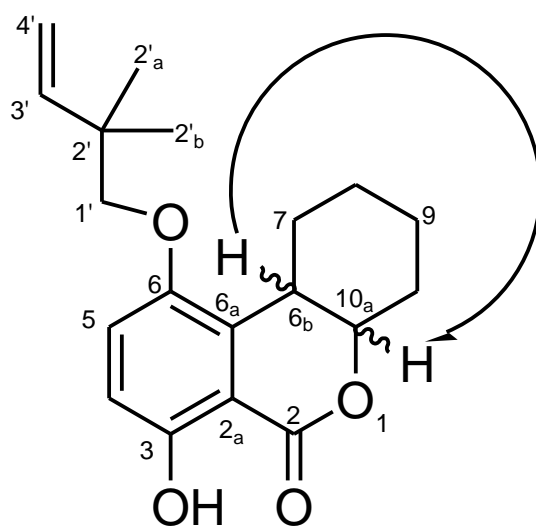

**Figure S8** Mass fragmentation scheme of 1*H*-benzochromenone derivative

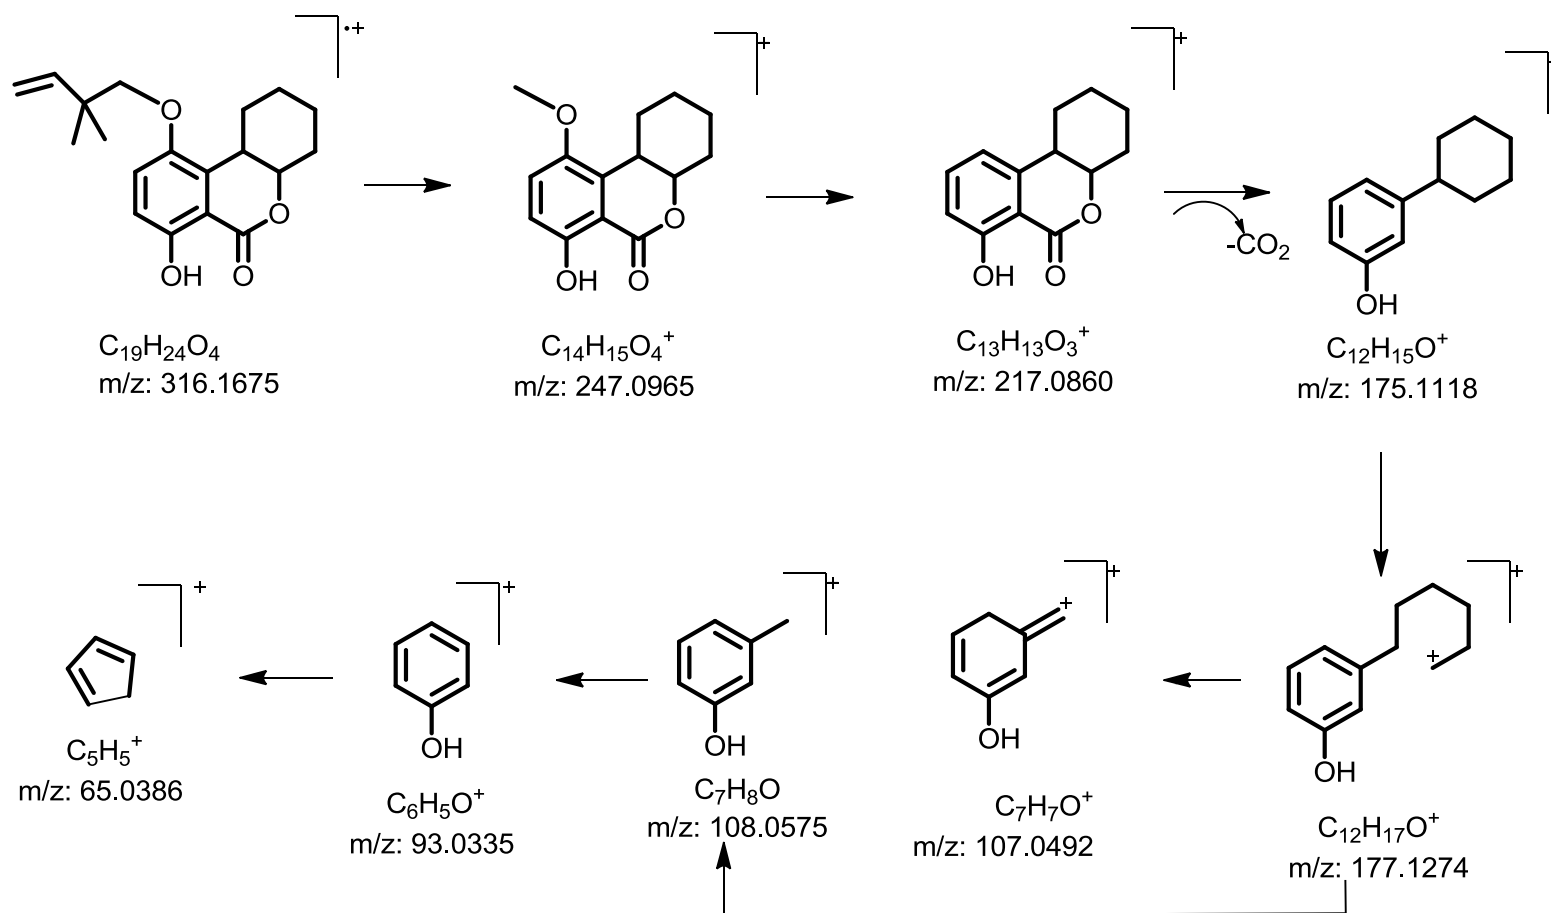

**Figure S9** Mass spectrum of 1*H*-benzochromenone derivative

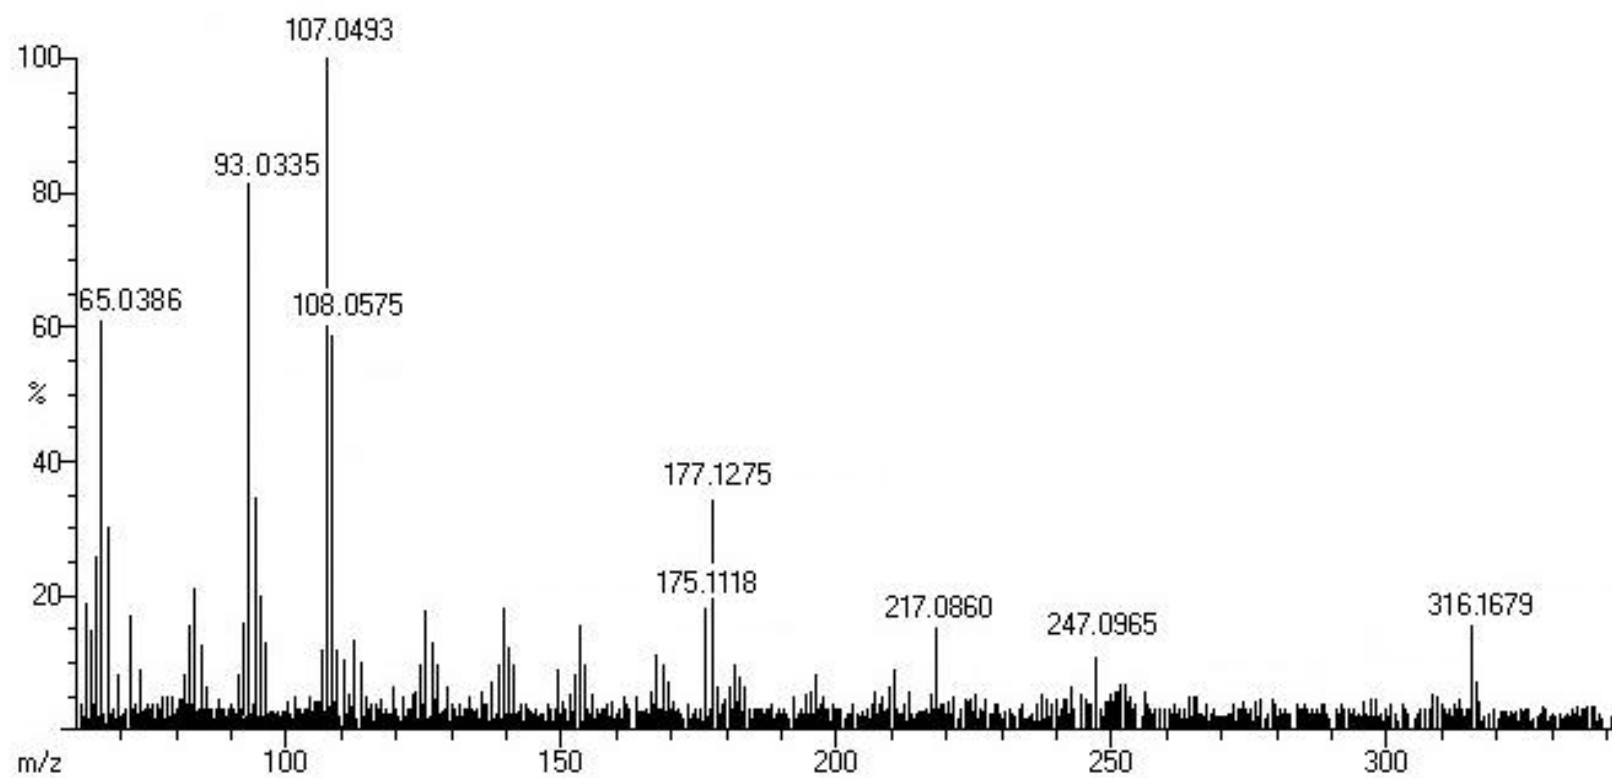

**Figure S10** IR spectrum of 1*H*-benzochromenone derivative

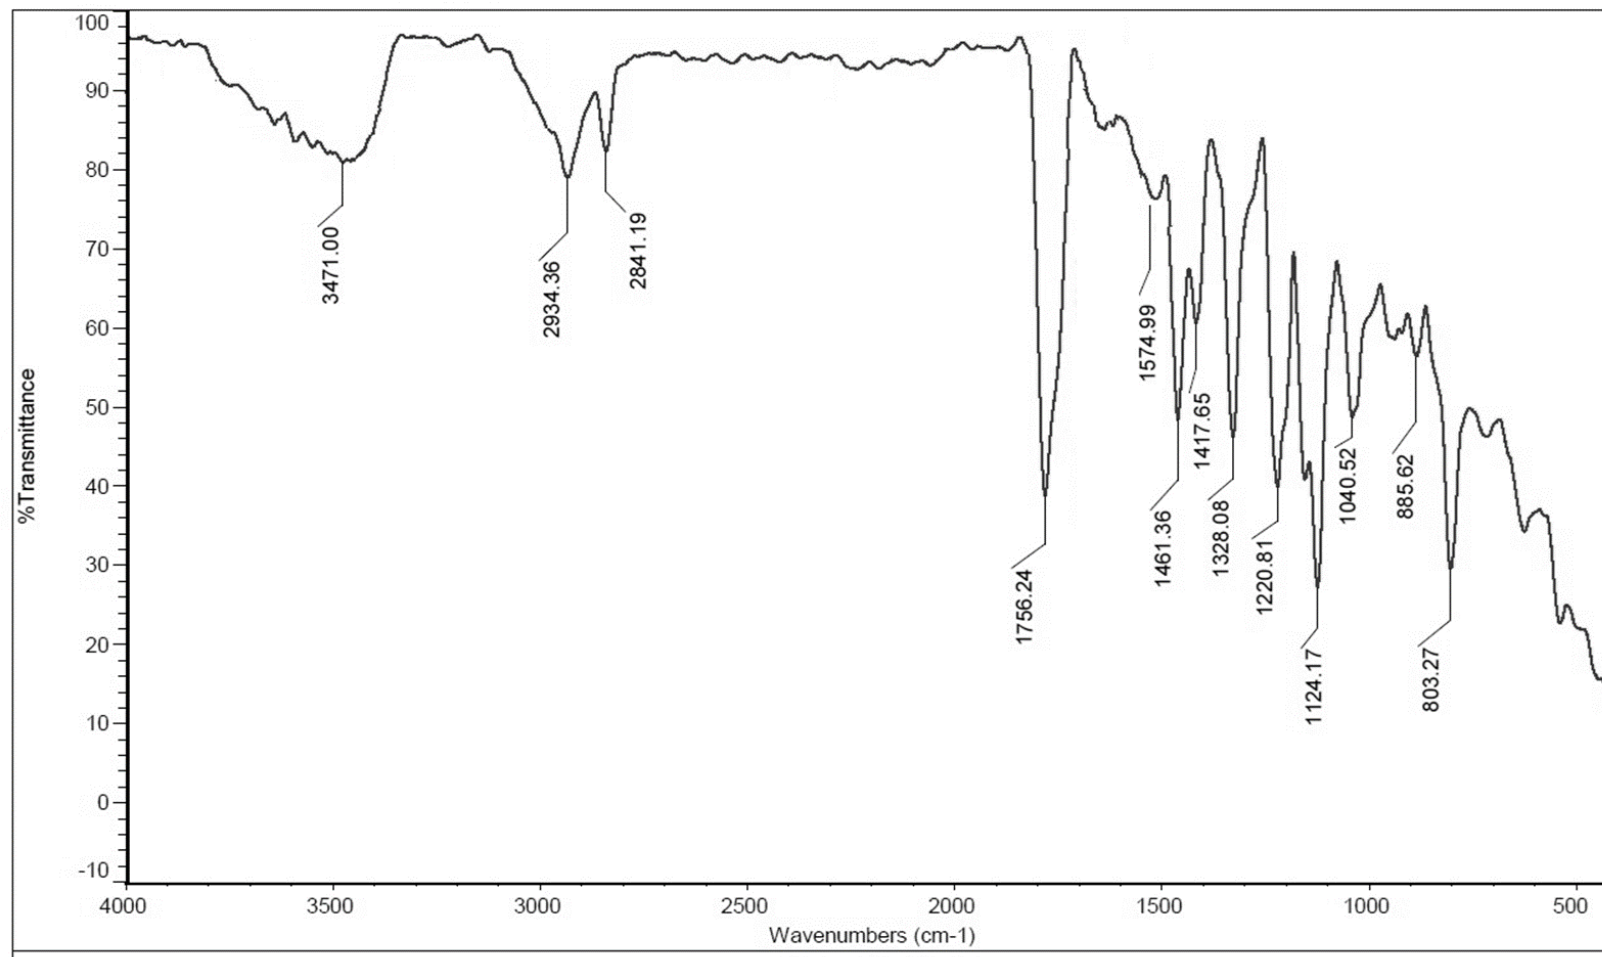

**Figure S11** HPLC chromatogram of 1*H*-benzochromenone derivative isolated from muricid gastropod *Chicoreus ramosus*

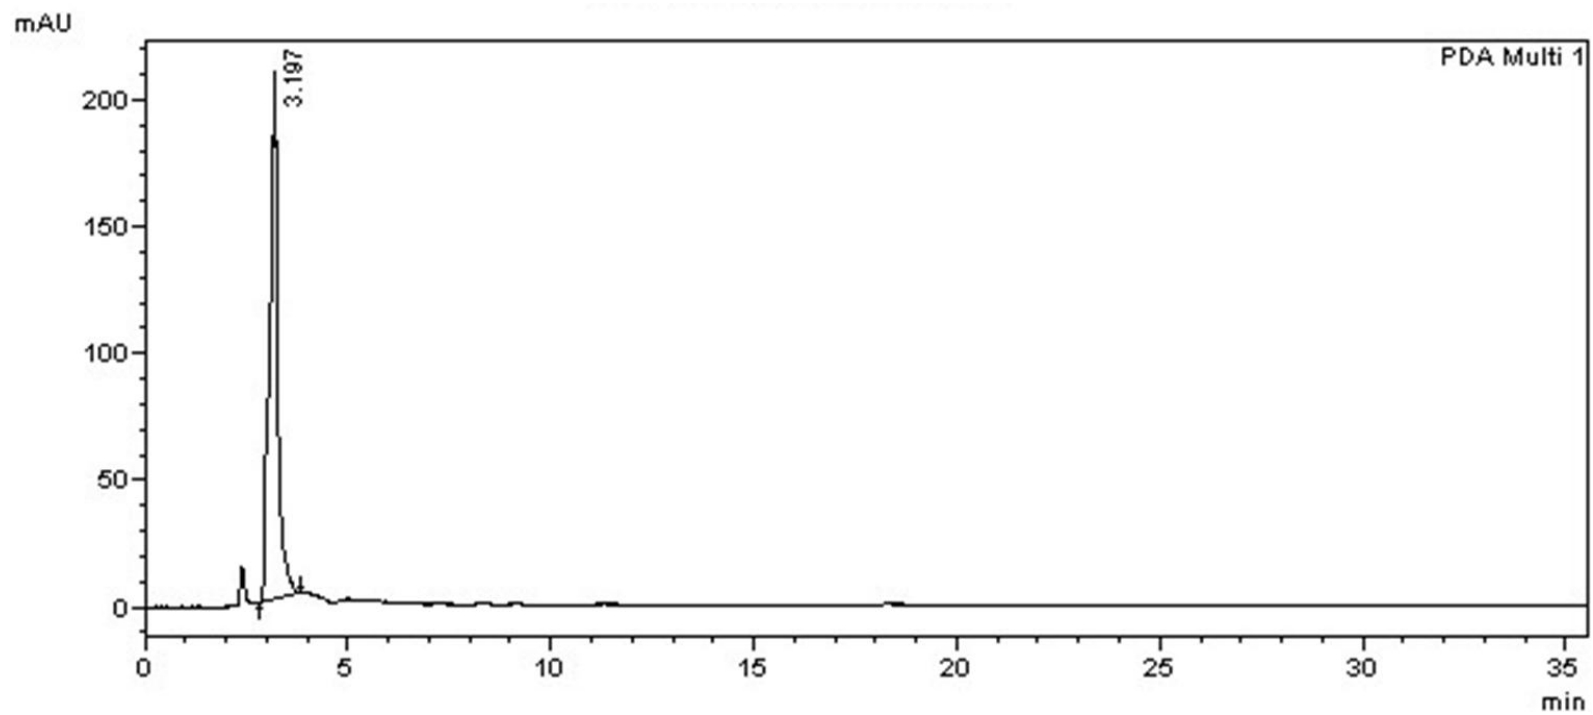

Supplement: Supplementary file 1 [file 17589710]
